# Supplementary material for: Predicting inadequate postoperative pain management in depressed patients: A machine learning approach
Source: PLOS journal article supplement (doi:10.1371/journal.pone.0210575), 2019-02-06
Supplement: S2 (10.1371/journal.pone.0210575.s002) [file journal.pone.0210575.s002]

**S2 Table. Unified Medical Language system's depression terms used to identify key concepts from clinical notes for depression diagnoses and symptoms.**

| <b>Depression Terms</b>                                             |                                                                        |                                                                                          |
|---------------------------------------------------------------------|------------------------------------------------------------------------|------------------------------------------------------------------------------------------|
| Adjustment disorder with depressed mood                             | Chronic recurrent major depressive disorder                            | Schizoaffective disorder, depressive type                                                |
| Brief depressive adjustment reaction                                | Recurrent major depressive disorder with catatonic features            | Post-schizophrenic depression                                                            |
| Mental Depression                                                   | Recurrent major depressive disorder with atypical features             | Bipolar affective disorder, currently depressed, mild                                    |
| Depression, Chemical                                                | Recurrent major depressive disorder with atypical features             | Bipolar affective disorder, currently depressed, moderate                                |
| Endogenous depression                                               | Recurrent major depressive disorder with postpartum onset              | Bipolar affective disorder, currently depressed, severe, with psychosis                  |
| Involutional Depression                                             | Minor depressive disorder                                              | Bipolar affective disorder, currently depressed, in full remission                       |
| Reactive depression                                                 | Endogenous depression - recurrent                                      | Manic-depressive - now manic                                                             |
| Depressive disorder                                                 | Postviral depression                                                   | Single major depressive episode, severe, with psychosis                                  |
| Single major depressive episode                                     | Chronic depression                                                     | Major depressive affective disorder, single episode, in partial or unspecified remission |
| melancholic depression                                              | Mild depression                                                        | Recurrent major depressive episodes, severe, with psychosis                              |
| Unipolar Depression                                                 | Moderate depression                                                    | Senile dementia with depressive or paranoid features                                     |
| seasonal depression                                                 | Severe depression                                                      | Chronic bipolar I disorder, most recent episode depressed                                |
| Depressive Symptoms                                                 | emotional and psychiatric depression                                   | Severe depressed bipolar I disorder with psychotic features, mood-congruent              |
| Depressive Syndrome                                                 | AODR depressive state                                                  | Severe depressed bipolar I disorder with psychotic features, mood-incongruent            |
| Arteriosclerotic dementia with depression                           | Recurrent major depressive disorder with melancholic features          | Bipolar I disorder, most recent episode depressed with catatonic features                |
| Mild major depression, single episode                               | depression anxiety disorder                                            |                                                                                          |
| Moderate major depression, single episode                           | Cancer patients and suicide and depression                             |                                                                                          |
| Severe major depression, single episode, without psychotic features | Monopolar depression, single episode or unspecified                    |                                                                                          |
| Single major depressive episode, in full remission                  | Depressive character or personality                                    |                                                                                          |
| Recurrent major depressive episodes                                 | Hyposomnia, insomnia or sleeplessness associated with depression       |                                                                                          |
| Mild recurrent major depression                                     | Hyposomnia, insomnia or sleeplessness associated with major depression |                                                                                          |
| Moderate recurrent major depression                                 | Hyposomnia, insomnia or sleeplessness associated with minor depression |                                                                                          |
| Severe recurrent major depression without psychotic features        |                                                                        |                                                                                          |
| Recurrent major depression in complete remission                    |                                                                        |                                                                                          |
| Atypical depressive disorder                                        |                                                                        |                                                                                          |

|                                                                                                                                                                                                                                                                                                                                                                                                                                                                                                                                                                                                                                                                                                                                                                                                                                                                                                                                                                                                                                                   |                                                                                                                                                                                                                                                                                                                                                                                                                                                                                                                                                                                                                                                                                                                                                                                                                                                                                                                                                                                                                                                                                              |                                                                                                                                                                                                                                                                                                                                                                                                                                                                                                                                                                                                                                                                                                                                                                                                                                                                                                                                                                                                                                                                                                                                                          |
|---------------------------------------------------------------------------------------------------------------------------------------------------------------------------------------------------------------------------------------------------------------------------------------------------------------------------------------------------------------------------------------------------------------------------------------------------------------------------------------------------------------------------------------------------------------------------------------------------------------------------------------------------------------------------------------------------------------------------------------------------------------------------------------------------------------------------------------------------------------------------------------------------------------------------------------------------------------------------------------------------------------------------------------------------|----------------------------------------------------------------------------------------------------------------------------------------------------------------------------------------------------------------------------------------------------------------------------------------------------------------------------------------------------------------------------------------------------------------------------------------------------------------------------------------------------------------------------------------------------------------------------------------------------------------------------------------------------------------------------------------------------------------------------------------------------------------------------------------------------------------------------------------------------------------------------------------------------------------------------------------------------------------------------------------------------------------------------------------------------------------------------------------------|----------------------------------------------------------------------------------------------------------------------------------------------------------------------------------------------------------------------------------------------------------------------------------------------------------------------------------------------------------------------------------------------------------------------------------------------------------------------------------------------------------------------------------------------------------------------------------------------------------------------------------------------------------------------------------------------------------------------------------------------------------------------------------------------------------------------------------------------------------------------------------------------------------------------------------------------------------------------------------------------------------------------------------------------------------------------------------------------------------------------------------------------------------|
| <p>Antidepressant type abuse</p> <p>Antidepressant type abuse, continuous</p> <p>Antidepressant type abuse, episodic</p> <p>Antidepressant type abuse, in remission</p> <p>Prolonged depressive adjustment reaction</p> <p>Adjustment disorder with mixed anxiety and depressed mood</p> <p>Cerebral depression, coma, and other abnormal cerebral signs in fetus or newborn</p> <p>Depression, Postpartum</p> <p>Recurrent depression</p> <p>Lifelong depressive personality trait</p> <p>Depressed reaction</p> <p>Agitated depression</p> <p>Depression aggravated</p> <p>Primary degenerative dementia of the Alzheimer type, senile onset, with depression</p> <p>Multi-infarct dementia with depression</p> <p>Major depression single episode, in partial remission</p> <p>Recurrent major depression in partial remission</p> <p>Organic mood disorder of depressed type</p> <p>Mild major depression</p> <p>Moderate major depression</p> <p>Severe major depression without psychotic features</p> <p>Major depression in remission</p> | <p>Hypersomnia associated with depression</p> <p>Hypersomnia associated with major depression</p> <p>Hypersomnia associated with minor depression</p> <p>Adjustment reaction with anxiety and depression</p> <p>Depressive disorder, NEC in ICD9CM_2014</p> <p>Depressive disorder, NEC in MDR</p> <p>Depressive disorder, NEC in CCS2003</p> <p>winter depression</p> <p>Major Depressive Disorder</p> <p>Major depression, melancholic type</p> <p>Self-control behavior: depression</p> <p>Acute depression</p> <p>Depression and Suicide Cancer Patient</p> <p>Depression and Suicide Depressed - symptom</p> <p>Drug-induced central nervous system depression</p> <p>Parkinsonism with alveolar hypoventilation and mental depression</p> <p>Depressive Disorder, Treatment-Resistant</p> <p>Severe recurrent major depression</p> <p>clinical depression</p> <p>Childhood Depression</p> <p>Severe major depression</p> <p>Recurrent major depressive episodes, mild</p> <p>Chronic depressive personality disorder</p> <p>Recurrent major depressive episodes, in full remission</p> | <p>Bipolar I disorder, most recent episode depressed with melancholic features</p> <p>Bipolar I disorder, most recent episode depressed with atypical features</p> <p>Bipolar I disorder, most recent episode depressed with postpartum onset</p> <p>Depressed bipolar I disorder in remission</p> <p>Bipolar II disorder, most recent episode major depressive</p> <p>Mild bipolar II disorder, most recent episode major depressive</p> <p>Moderate bipolar II disorder, most recent episode major depressive</p> <p>Chronic bipolar II disorder, most recent episode major depressive</p> <p>Severe bipolar II disorder, most recent episode major depressive without psychotic features</p> <p>Bipolar II disorder, most recent episode major depressive with catatonic features</p> <p>Bipolar II disorder, most recent episode major depressive with melancholic features</p> <p>Bipolar II disorder, most recent episode major depressive with atypical features</p> <p>Bipolar II disorder, most recent episode major depressive with postpartum onset</p> <p>Severe bipolar II disorder, most recent episode major depressive, in remission</p> |
|---------------------------------------------------------------------------------------------------------------------------------------------------------------------------------------------------------------------------------------------------------------------------------------------------------------------------------------------------------------------------------------------------------------------------------------------------------------------------------------------------------------------------------------------------------------------------------------------------------------------------------------------------------------------------------------------------------------------------------------------------------------------------------------------------------------------------------------------------------------------------------------------------------------------------------------------------------------------------------------------------------------------------------------------------|----------------------------------------------------------------------------------------------------------------------------------------------------------------------------------------------------------------------------------------------------------------------------------------------------------------------------------------------------------------------------------------------------------------------------------------------------------------------------------------------------------------------------------------------------------------------------------------------------------------------------------------------------------------------------------------------------------------------------------------------------------------------------------------------------------------------------------------------------------------------------------------------------------------------------------------------------------------------------------------------------------------------------------------------------------------------------------------------|----------------------------------------------------------------------------------------------------------------------------------------------------------------------------------------------------------------------------------------------------------------------------------------------------------------------------------------------------------------------------------------------------------------------------------------------------------------------------------------------------------------------------------------------------------------------------------------------------------------------------------------------------------------------------------------------------------------------------------------------------------------------------------------------------------------------------------------------------------------------------------------------------------------------------------------------------------------------------------------------------------------------------------------------------------------------------------------------------------------------------------------------------------|

|                                                                                             |                                                                  |                                                                                        |
|---------------------------------------------------------------------------------------------|------------------------------------------------------------------|----------------------------------------------------------------------------------------|
| Major depression in partial remission                                                       | Adjustment disorder with depressed mood in remission             | Severe bipolar II disorder, most recent episode major depressive, in partial remission |
| Major depression in complete remission                                                      | Depressive disorder in remission                                 | Severe bipolar II disorder, most recent episode major depressive, in full remission    |
| Major depression, single episode, in complete remission                                     | Depressive disorder in mother complicating childbirth            | depressive delusion                                                                    |
| Recurrent major depression in remission                                                     | Major depressive disorder in mother                              | depressive schizoaffective disorders                                                   |
| Stuporous depression                                                                        | Manic-Depression                                                 | Depression, psychotic                                                                  |
| Depression, Neurotic depressive personality                                                 | Depression, Bipolar                                              | depression psychotic feature                                                           |
| Presenile dementia with depression                                                          | Depression, Reactive, Psychotic                                  | Senile dementia with delusional or depressive features                                 |
| Senile dementia with depression                                                             | MANIC DEPRESSIVE DISEASE, MANIC PHASE                            | Manic-depressive psychosis, circular type but currently manic                          |
| Drug-induced depressive state                                                               | Severe major depression, single episode, with psychotic features | Manic-depressive psychosis, circular type but currently depressed                      |
| Recurrent major depressive episodes, moderate                                               | Severe recurrent major depression with psychotic features        | Manic-depressive psychosis, circular type, mixed                                       |
| Major depressive affective disorder, recurrent episode, in partial or unspecified remission | Bipolar I disorder, most recent episode (or current) depressed   | Transient organic psychotic condition, depressive type                                 |
| Endogenous depression first episode                                                         | Depressed bipolar I disorder                                     | Manic-depressive psychosis or reaction, hypomanic, single episode or unspecified       |
| Masked depression                                                                           | Mild depressed bipolar I disorder                                | Manic-depressive psychosis or reaction, manic, single episode or unspecified           |
| Mixed anxiety and depressive disorder                                                       | Moderate depressed bipolar I disorder                            | Depressive psychosis, single episode or unspecified                                    |
| Brief depressive reaction                                                                   | Severe depressed bipolar I disorder without psychotic features   | Endogenous depression, single episode or unspecified                                   |
| Depressive conduct disorder                                                                 | Depressed bipolar I disorder in partial remission                | Manic-depressive psychosis or reaction, depressed type, single episode or unspecified  |
| Mild postnatal depression                                                                   | Depressed bipolar I disorder in full remission                   | Psychotic depression, single episode or unspecified                                    |
| Severe postnatal depression                                                                 | Manic Type Manic                                                 | Manic-depressive psychosis, circular type, current                                     |
| Pseudo-Cushing's syndrome of depression                                                     | Depressive Illness                                               |                                                                                        |
| Depressive episode, unspecified                                                             | Severe major depression with psychotic features                  |                                                                                        |
| Postoperative depression                                                                    |                                                                  |                                                                                        |
| Feeling depressed                                                                           |                                                                  |                                                                                        |
| Mood disorder with depressive features due to general medical condition                     |                                                                  |                                                                                        |

|                                                                                                                                                                                                                                                                                                                                                                                                                                                    |                                                                                                                                                                                                                                                                                                                                                                                                                                                                            |                                                                                                                                                                                                                                                                                                                                                                                                                                                                                     |
|----------------------------------------------------------------------------------------------------------------------------------------------------------------------------------------------------------------------------------------------------------------------------------------------------------------------------------------------------------------------------------------------------------------------------------------------------|----------------------------------------------------------------------------------------------------------------------------------------------------------------------------------------------------------------------------------------------------------------------------------------------------------------------------------------------------------------------------------------------------------------------------------------------------------------------------|-------------------------------------------------------------------------------------------------------------------------------------------------------------------------------------------------------------------------------------------------------------------------------------------------------------------------------------------------------------------------------------------------------------------------------------------------------------------------------------|
| Mood disorder with major depressive-like episode due to general medical condition<br>Menopausal depression<br>Chronic major depressive disorder, single episode<br>Major depressive disorder, single episode with catatonic features<br>Major depressive disorder, single episode with melancholic features<br>Major depressive disorder, single episode with atypical features<br>Major depressive disorder, single episode with postpartum onset | Severe major depression with psychotic features, mood-congruent<br>Severe major depression with psychotic features, mood-incongruent<br>Severe major depression, single episode, with psychotic features, mood-congruent<br>Severe major depression, single episode, with psychotic features, mood-incongruent<br>Severe recurrent major depression with psychotic features, mood-congruent<br>Severe recurrent major depression with psychotic features, mood-incongruent | condition not specified as either manic or depressive<br>Manic-depressive psychosis, mixed type<br>bipolar depression<br>depressed phase<br>Bipolar I disorder, most recent episode (or current) depressed<br>Manic-Depressive Illness<br><b>MANIC-DEPRESSIVE PSYCHOSIS</b><br>Reactive depressive psychosis, single episode<br>Severe depressed bipolar I disorder<br>Depressive type psychosis<br>Manic-depressive illness in children<br>Manic-depressive illness in adolescence |
|----------------------------------------------------------------------------------------------------------------------------------------------------------------------------------------------------------------------------------------------------------------------------------------------------------------------------------------------------------------------------------------------------------------------------------------------------|----------------------------------------------------------------------------------------------------------------------------------------------------------------------------------------------------------------------------------------------------------------------------------------------------------------------------------------------------------------------------------------------------------------------------------------------------------------------------|-------------------------------------------------------------------------------------------------------------------------------------------------------------------------------------------------------------------------------------------------------------------------------------------------------------------------------------------------------------------------------------------------------------------------------------------------------------------------------------|
